# Supplementary material for: A Thermoresponsive Chitosan/β-Glycerophosphate Hydrogel for Minimally Invasive Treatment of Critical Limb Ischaemia
Source: MDPI journal article supplement (doi:10.3390/polym13203568), 2021-10-16
Supplement: s1 [file s1]

# A thermoresponsive chitosan/ $\beta$ -glycerophosphate hydrogel for minimally invasive treatment of critical limb ischaemia

Caroline Herron, Conn L. Hastings, Clodagh Herron-Rice, Helena M. Kelly, Joanne O'Dwyer, Garry P. Duffy.

## Supplementary Material

CD31 staining of the thigh and calf of mice was performed. This staining showed that ligation of the vessel, significantly ( $p < 0.001$ ) increased the vessel count, compared to that in the non-ligated limb in both the thigh (Fig. S1) and the calf (Fig. S2).

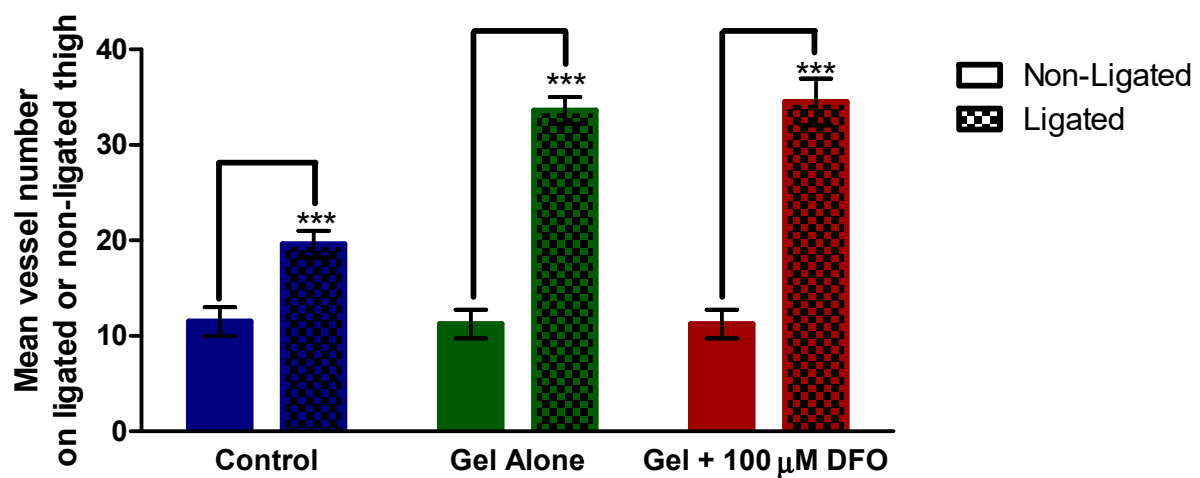

**Figure S1** CD31 vessel counts in the thigh of ligated and non-ligated limbs. Ligation significantly increased the vessel count in the thigh compared to the thigh of a non-ligated limb. \*\*\*= $p < 0.001$ .  $n = 8$ .

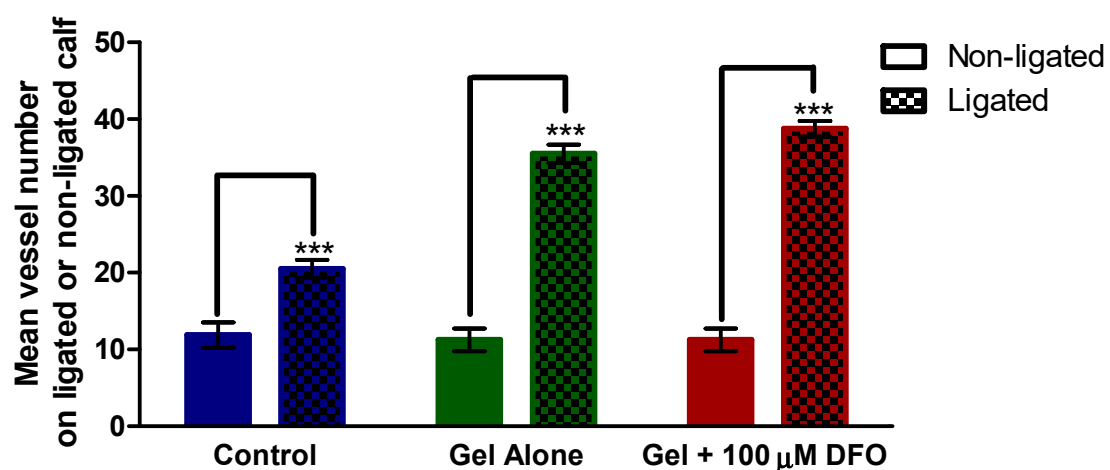

**Figure S2** CD31 vessel counts in the calf of ligated and non-ligated limbs. Ligation significantly increased the vessel count in the thigh compared to the thigh of a non-ligated limb. \*\*\*= $p < 0.001$ .  $n = 8$ .
